# Supplementary material for: Workplace health promotion and safety in state and territorial health departments in the United States: a national mixed-methods study of activity, capacity, and growth opportunities
Source: Springer Nature journal article supplement (doi:10.1186/s12889-019-6575-x), 2019-03-12
Supplement: MOESM4 [file 16541334]

| <b>National Survey of State and Territorial Health Departments' Workplace Health and Safety Activities: Occupational Safety and Health (OSH) Surveillance Activities</b> |          | <b>OSH survey respondents (n=39)</b> |
|--------------------------------------------------------------------------------------------------------------------------------------------------------------------------|----------|--------------------------------------|
| SHD compiles, analyzes, and interprets Occupational Health Indicators (OHIs)                                                                                             |          | 72% (28)                             |
| How many OHIs are tracked?                                                                                                                                               |          |                                      |
| 0-14                                                                                                                                                                     | 8% (3)   |                                      |
| 15-21                                                                                                                                                                    | 38% (15) |                                      |
| All 22                                                                                                                                                                   | 26% (10) |                                      |
| <b>SHD (independently, in partnership, or through a bona fide agent) conducts...</b>                                                                                     |          |                                      |
| ...surveillance of occupational lead levels in adults and submission of data to the NIOSH Adult Blood Lead Epidemiology and Surveillance (ABLES) program                 |          | 85% (33)                             |
| ...Workers' Compensation surveillance, beyond the collection of Workers' Compensation-related OHIs                                                                       |          | 49% (19)                             |
| ...targeted surveillance of target worker populations                                                                                                                    |          | 49% (18)                             |
| ...monitoring of indicators for the Healthy People 2020 occupational safety and health (OSH) objectives                                                                  |          | 38% (14)                             |
| ...targeted surveillance for fatality assessment, control, and evaluation (FACE)                                                                                         |          | 37% (14)                             |
| ...targeted surveillance of pesticide illness and injury                                                                                                                 |          | 36% (13)                             |
| ...targeted surveillance of occupational respiratory disease                                                                                                             |          | 35% (13)                             |
| ...monitoring of data from the National Surveillance System for Pneumoconiosis Mortality (NSSPM)                                                                         |          | 19% (7)                              |
| ...targeted surveillance of musculoskeletal disorders                                                                                                                    |          | 19% (7)                              |
| <b>SHD (independently, in partnership, or through a bona fide agent)...</b>                                                                                              |          |                                      |
| ...presents OSH surveillance data to relevant staff (occupational health professionals and health care providers) at workplaces within their state                       |          | 62% (24)                             |
