# Supplementary material for: Workplace health promotion and safety in state and territorial health departments in the United States: a national mixed-methods study of activity, capacity, and growth opportunities
Source: Springer Nature journal article supplement (doi:10.1186/s12889-019-6575-x), 2019-03-12
Supplement: MOESM5 [file 16541334]

| <b>National Survey of State and Territorial Health Departments' Workplace Health and Safety Activities: Implementation Supports - How Many Employers Are Reached?</b> |                                   |                                      |                |                 |                  |                       |
|-----------------------------------------------------------------------------------------------------------------------------------------------------------------------|-----------------------------------|--------------------------------------|----------------|-----------------|------------------|-----------------------|
|                                                                                                                                                                       | SHD does not provide this service | SHD does not track employers reached | 0-25 employers | 26-50 employers | 51-100 employers | 101 or more employers |
| <b>How many employers are reached by each type of OSH implementation support?</b>                                                                                     |                                   |                                      |                |                 |                  |                       |
| Tools                                                                                                                                                                 | 32% (12)                          | 32% (12)                             | 11% (4)        | 3% (1)          | 5% (2)           | 16% (6)               |
| Training                                                                                                                                                              | 61% (22)                          | 17% (6)                              | 8% (3)         | 3% (1)          | 8% (3)           | 3% (1)                |
| Technical Assistance                                                                                                                                                  | 39% (14)                          | 17% (6)                              | 42% (15)       | 3% (1)          | 0% (0)           | 0% (0)                |
| Quality Assurance/Improvement                                                                                                                                         | 82% (28)                          | 6% (2)                               | 6% (2)         | 3% (1)          | 0% (0)           | 3% (1)                |
| <b>How many employers are reached by each type of WHP implementation support?</b>                                                                                     |                                   |                                      |                |                 |                  |                       |
| Tools                                                                                                                                                                 | 10% (4)                           | 15% (6)                              | 10% (4)        | 8% (3)          | 15% (6)          | 43% (17)              |
| Training                                                                                                                                                              | 23% (9)                           | 8% (3)                               | 13% (5)        | 10% (4)         | 20% (8)          | 28% (11)              |
| Technical Assistance                                                                                                                                                  | 21% (8)                           | 8% (3)                               | 18% (7)        | 13% (5)         | 16% (6)          | 24% (9)               |
| Quality Assurance/Improvement                                                                                                                                         | 38% (14)                          | 14% (5)                              | 8% (3)         | 11% (4)         | 14% (5)          | 16% (6)               |

\*n=39 OSH respondents and n=40 WHP respondents
